# Supplementary material
Source: PubMed Central journal article supplement (PMC2899922)
Supplement: pp.110.155747_1.pdf [file pp.110.155747_1.pdf]

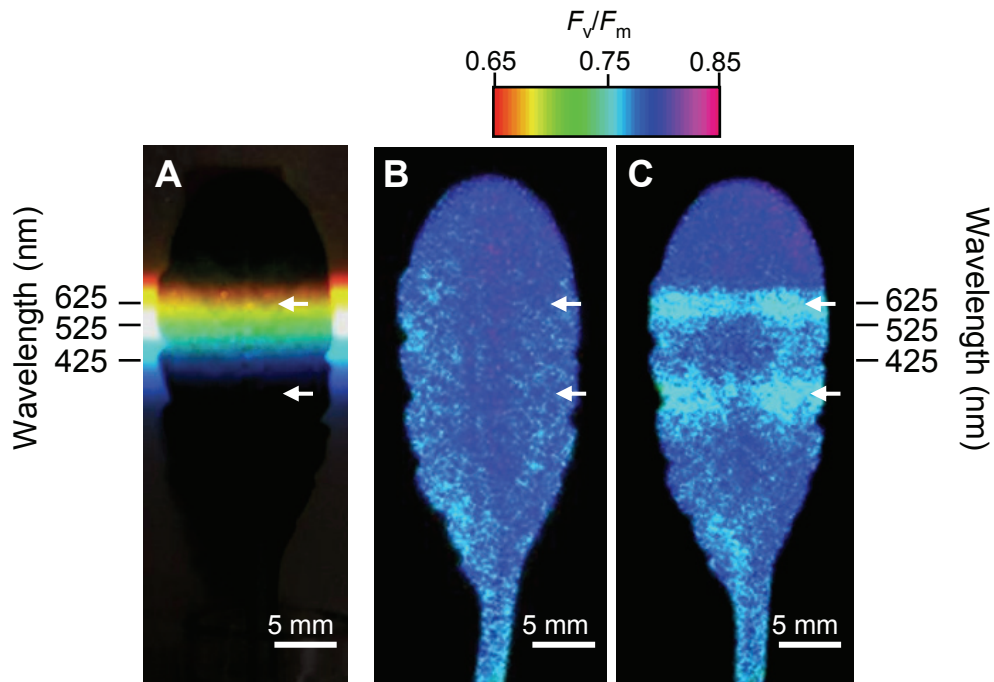

**Supplemental Figure 1.** Photodamage to PSII under different wavelengths of sunlight. An Arabidopsis leaf was pre-incubated with 1mM chloramphenicol at  $20 \mu\text{mol photons m}^{-2} \text{s}^{-1}$  for 4 h. The leaf was exposed to spectrally dispersed sunlight for 15 min. The maximum quantum yield of PSII ( $F_v/F_m$ ) was measured with an imaging-PAM before and after the light exposure. A, Photograph of Arabidopsis leaf exposed to sunlight dispersed using a prism. B, Image of the  $F_v/F_m$  value before exposure to dispersed sunlight. C, Image of the  $F_v/F_m$  value after exposure to dispersed sunlight for 15 min. Approximate wavelengths of light regions incident on the leaf were determined with pairs of LS and LL cutoff filters and are shown in A and C. The pairs of arrows in each panel are aligned with the two photoinhibition peaks.
