# Supplementary material
Source: PubMed Central journal article supplement (PMC2899922)
Supplement: pp.110.155747_2.pdf [file pp.110.155747_2.pdf]

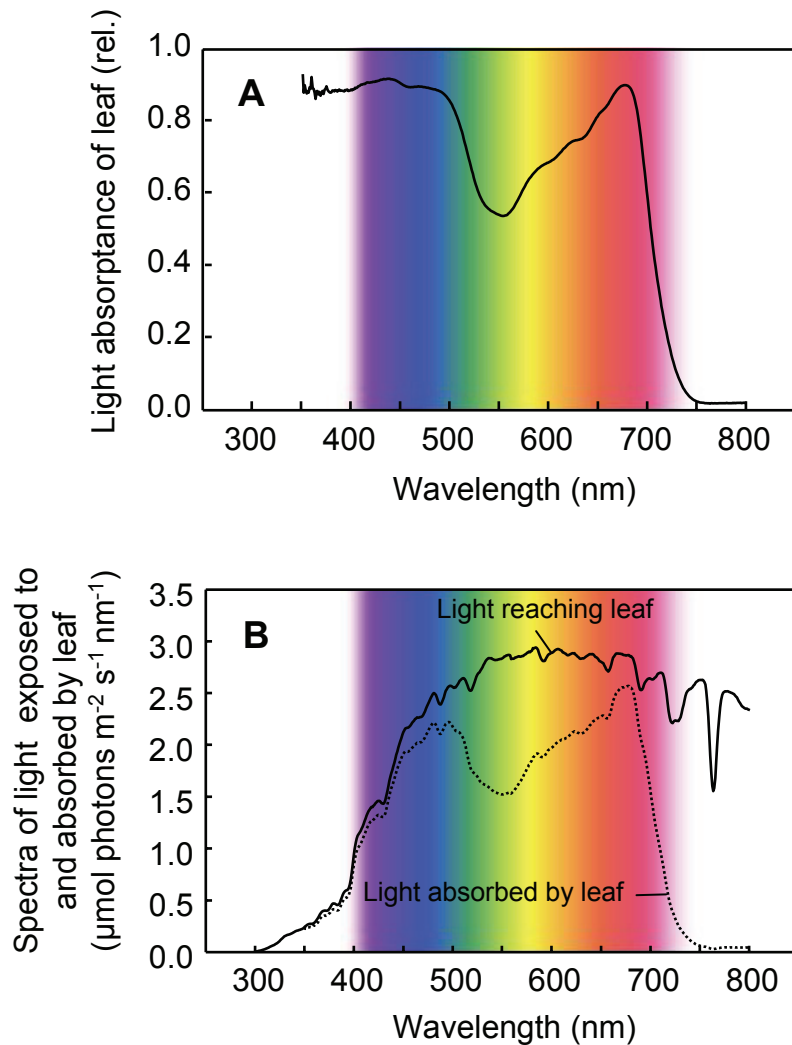

**Supplemental Figure 2.** A, The spectrum of light absorbance of a leaf. B, The spectra of light reaching the leaf and absorbed by the leaf during the photodamage experiment to the leaf in Figure 2. Spectrum of light absorbed by the leaf was calculated from multiplying the light absorbance at each wavelength by light reaching the leaf.
