# Supplementary material
Source: PubMed Central journal article supplement (PMC2899922)
Supplement: pp.110.155747_3.pdf [file pp.110.155747_3.pdf]

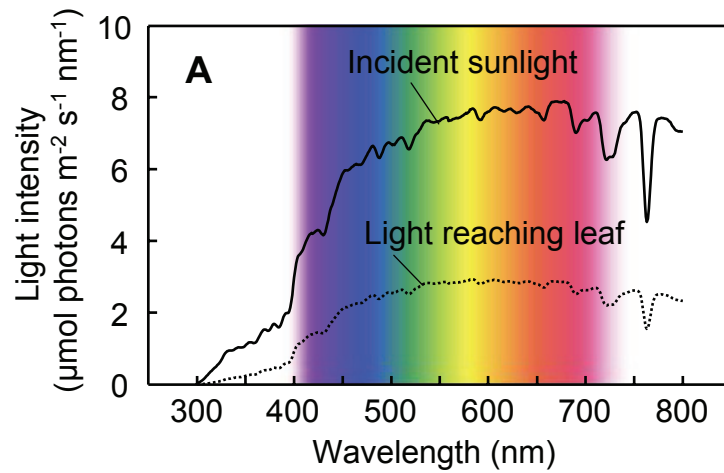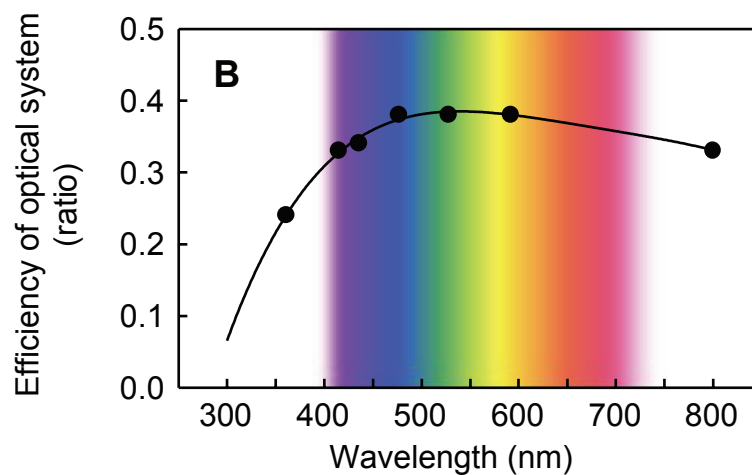

**Supplemental Figure 3.** Spectra of incident sunlight and light reaching the leaf. A, Intensity of incident sunlight and light reaching the leaf. B, The efficiency of the optical system. The efficiency was calculated at each position as the ratio of the irradiance at the peak wavelength to that of incident sunlight.
